# Supplementary material for: Shipborne measurements of total OH reactivity around the Arabian Peninsula and its role in ozone chemistry
Source: Copernicus journal article supplement (doi:10.5194/acp-2019-416), 2019-05-28
Supplement: Supplementary file [file acp-2019-416-AC2-supplement.zip]

## Supplementary Information

### S1. Laboratory characterizations of NO, NO<sub>2</sub> and ozone interferences

#### S1.1 NO interference

To quantify the NO interference, NO from a standard gas cylinder (Air Liquide, Krefeld, Germany) was added to the CRM system running in C2 mode at pyrrole/OH  $\approx$  2.0. The mixing ratios of the added NO were ~0, 5, 10, 15, 20, 30, 90, 140, 170, 220, 350 ppb. The resulting decrease in pyrrole mixing ratio ( $\Delta$ C3 in ppb) vs. the NO mixing ratio resulted in a polynomial relationship of the form  $\Delta$ C3 = a[NO]<sup>2</sup> + b[NO]. During AQABA: a  $\approx$  -3E-4; b  $\approx$  0.17.

#### S1.2 NO<sub>2</sub> interference

To quantify the NO<sub>2</sub> interference, NO<sub>2</sub> from a standard gas cylinder (Westfalen AG, Münster, Germany) was added to the CRM system running in C2 mode at pyrrole/OH  $\approx$  2.0. All tubes were flushed with NO<sub>2</sub> for several hours and the contact of the NO<sub>2</sub> with metal surfaces (pressure reducer, mass flow controller) was reduced to a minimum to avoid losses. To quantify the amount of NO<sub>2</sub> lost/converted to NO in the setup used, conversion to NO was monitored by an NO/NO<sub>2</sub> analyzer (Two-channel-chemiluminescence detector). 8–12 % of the NO<sub>2</sub> was converted to NO depending on the flows and mixing ratios used. This loss was corrected for when calculating the NO<sub>2</sub> mixing ratios in the reactor. The mixing ratios of the added NO<sub>2</sub> were ~0, 20, 40, 60, 100 ppb. The resulting decrease in pyrrole mixing ratio ( $\Delta$ C3 in ppb) vs. the NO<sub>2</sub> mixing ratio resulted in a polynomial relationship of the form  $\Delta$ C3 = a[NO<sub>2</sub>]<sup>2</sup> + b[NO<sub>2</sub>]. During AQABA: a  $\approx$  -2E-4; b  $\approx$  0.08.

#### S1.3 Ozone interference

Using an ozone generator (Thermo 49C O3 Calibrator, Thermo Environmental Instruments LLC, Franklin, USA), ozone was added to the CRM system running in C2 mode at pyrrole/OH  $\approx$  2.0. Ozone mixing ratios used were ~ 0, 20, 30, 45, 90, 130, 180, 260, 350 ppb. The resulting decrease in pyrrole mixing ratio ( $\Delta$ C3 in ppb) vs. the O<sub>3</sub> mixing ratio resulted in a linear relationship of the form  $\Delta$ C3 = a[O<sub>3</sub>]. During AQABA: a  $\approx$  0.0058.

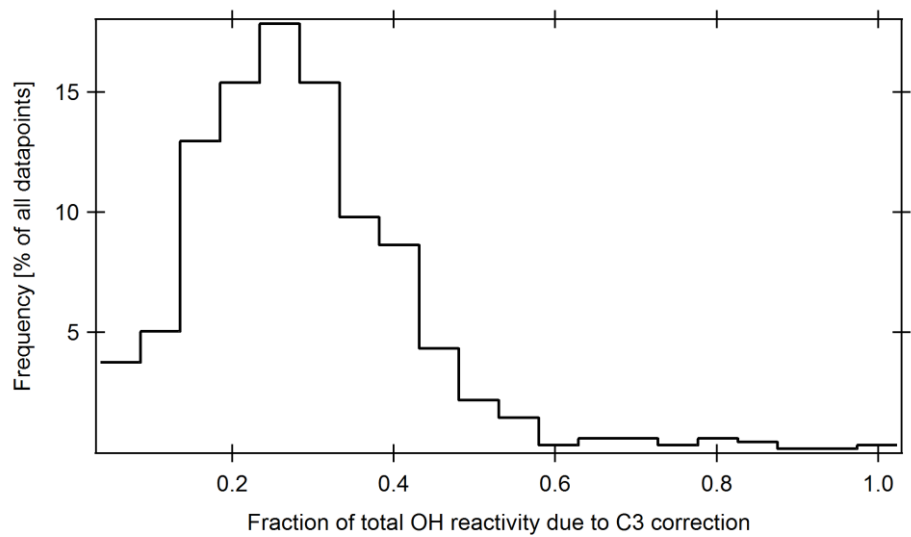

**Figure S1.** Frequency distribution of total OH reactivity fractions due to the NO, NO<sub>2</sub> and ozone corrections (C3 correction) for all datapoints in 50 min time resolution.

Table S1: Chemical species used for calculating speciated OH reactivity

| Compound/<br>protonated mass<br>(grey shaded<br>compounds are gas<br>standard calibrated<br>with low uncertainty) | Chemical<br>formula            | $k_{M+OH}$ [cm <sup>3</sup><br>molecules <sup>-1</sup><br>s <sup>-1</sup> ] | Instrument                                                | Compounds attributed to<br>protonated mass | If no unambiguous<br>compound<br>identification:<br>reaction rate<br>coefficient derived<br>from... | Literature reference for<br>reaction rate coefficient | Max. OH<br>reactivity<br>during<br>AQABA<br>[s <sup>-1</sup> ] | Comment |
|-------------------------------------------------------------------------------------------------------------------|--------------------------------|-----------------------------------------------------------------------------|-----------------------------------------------------------|--------------------------------------------|-----------------------------------------------------------------------------------------------------|-------------------------------------------------------|----------------------------------------------------------------|---------|
| <b>Alkanes</b>                                                                                                    |                                |                                                                             |                                                           |                                            |                                                                                                     |                                                       |                                                                |         |
| Methane                                                                                                           | CH <sub>4</sub>                | 6.45E-15                                                                    | Picarro Cavity<br>ring-down<br>spectroscopy<br>instrument |                                            |                                                                                                     | IUPAC preferred value                                 | 0.35                                                           |         |
| Ethane                                                                                                            | C <sub>2</sub> H <sub>6</sub>  | 2.40E-13                                                                    | GC-FID                                                    |                                            |                                                                                                     | IUPAC preferred value                                 | 0.26                                                           |         |
| Propane                                                                                                           | C <sub>3</sub> H <sub>8</sub>  | 1.10E-12                                                                    | GC-FID                                                    |                                            |                                                                                                     | IUPAC preferred value                                 | 1.33                                                           |         |
| 2-Methylpropane                                                                                                   | C <sub>4</sub> H <sub>10</sub> | 2.12E-12                                                                    | GC-FID                                                    |                                            |                                                                                                     | Atkinson and Arey, 2003                               | 0.68                                                           |         |
| n-Butane                                                                                                          | C <sub>4</sub> H <sub>10</sub> | 2.35E-12                                                                    | GC-FID                                                    |                                            |                                                                                                     | IUPAC preferred value                                 | 1.42                                                           |         |
| 2-Methylbutane                                                                                                    | C <sub>5</sub> H <sub>12</sub> | 3.60E-12                                                                    | GC-FID                                                    |                                            |                                                                                                     | Atkinson and Arey, 2003                               | 0.92                                                           |         |
| n-pentane                                                                                                         | C <sub>5</sub> H <sub>12</sub> | 3.80E-12                                                                    | GC-FID                                                    |                                            |                                                                                                     | Atkinson and Arey, 2003                               | 1.03                                                           |         |
| 2-Methylpentane                                                                                                   | C <sub>6</sub> H <sub>14</sub> | 5.20E-12                                                                    | GC-FID                                                    |                                            |                                                                                                     | Atkinson and Arey, 2003                               | 0.11                                                           |         |
| n-hexane                                                                                                          | C <sub>6</sub> H <sub>14</sub> | 5.20E-12                                                                    | GC-FID                                                    |                                            |                                                                                                     | Atkinson and Arey, 2003                               | 0.16                                                           |         |
| 2,2,4-<br>Trimethylpentane                                                                                        | C <sub>8</sub> H <sub>18</sub> | 3.34E-12                                                                    | GC-FID                                                    |                                            |                                                                                                     | Atkinson and Arey, 2003                               | 0.004                                                          |         |
| n-heptane                                                                                                         | C <sub>7</sub> H <sub>16</sub> | 6.76E-12                                                                    | GC-FID                                                    |                                            |                                                                                                     | Atkinson and Arey, 2003                               | 0.06                                                           |         |
| Octane                                                                                                            | C <sub>8</sub> H <sub>18</sub> | 8.11E-12                                                                    | GC-FID                                                    |                                            |                                                                                                     | Atkinson and Arey, 2003                               | 0.04                                                           |         |
| <b>Alkenes and Alkynes</b>                                                                                        |                                |                                                                             |                                                           |                                            |                                                                                                     |                                                       |                                                                |         |
| Ethene                                                                                                            | C <sub>2</sub> H <sub>4</sub>  | 7.50E-12                                                                    | GC-FID                                                    |                                            |                                                                                                     | IUPAC preferred value                                 | 2.26                                                           |         |
| Propene                                                                                                           | C <sub>3</sub> H <sub>6</sub>  | 2.90E-11                                                                    | GC-FID                                                    |                                            |                                                                                                     | IUPAC preferred value                                 | 1.11                                                           |         |
| trans-2-butene                                                                                                    | C <sub>4</sub> H <sub>8</sub>  | 6.40E-11                                                                    | GC-FID                                                    |                                            |                                                                                                     | IUPAC preferred value                                 | 0.11                                                           |         |
| 1-Butene                                                                                                          | C <sub>4</sub> H <sub>8</sub>  | 3.14E-11                                                                    | GC-FID                                                    |                                            |                                                                                                     | IUPAC preferred value                                 | 0.26                                                           |         |
| 1-Pentene                                                                                                         | C <sub>5</sub> H <sub>10</sub> | 3.14E-11                                                                    | GC-FID                                                    |                                            |                                                                                                     | Atkinson and Arey, 2003                               | 0.10                                                           |         |
| Isoprene                                                                                                          | C <sub>5</sub> H <sub>8</sub>  | 1.00E-10                                                                    | GC-FID                                                    |                                            |                                                                                                     | IUPAC preferred value                                 | 0.76                                                           |         |
| 27.023                                                                                                            | C <sub>2</sub> H <sub>2</sub>  | 7.50E-13                                                                    | PTR-ToF-MS                                                | Ethyne                                     |                                                                                                     | IUPAC preferred value                                 | 0.001                                                          |         |
| 41.0386                                                                                                           | C <sub>3</sub> H <sub>4</sub>  | 6.95E-13                                                                    | PTR-ToF-MS                                                | Propyne; 1,2-Propadiene                    | average                                                                                             | Warnatz, 1984; Atkinson and Arey, 2003                | 0.27                                                           |         |
| 67.0543                                                                                                           | C <sub>5</sub> H <sub>6</sub>  | 5.16E-11                                                                    | PTR-ToF-MS                                                | 1,3-Cyclopentadiene; 3-penten-2-yne        | average                                                                                             | Grosjean and Williams, 1992; Boodaghians et al., 1987 | 0.35                                                           |         |

|                           |                                 |          |            |                                                                                                                                                                                                                                              |         |                                                                             |      |                                                                   |
|---------------------------|---------------------------------|----------|------------|----------------------------------------------------------------------------------------------------------------------------------------------------------------------------------------------------------------------------------------------|---------|-----------------------------------------------------------------------------|------|-------------------------------------------------------------------|
| 69.0699                   | C <sub>5</sub> H <sub>8</sub>   | 5.10E-11 | PTR-ToF-MS | 1-Pentyne; 1,2-Pentadiene; 1,4-Pentadiene; 1,3-Pentadiene; Cyclopentene                                                                                                                                                                      | average | Boodaghians et al., 1987; Rogers, 1989; Ohta, 1983; Atkinson and Arey, 2003 | 1.92 | C <sub>5</sub> dienes. Isoprene measured by GC-FID was subtracted |
| 83.0856                   | C <sub>6</sub> H <sub>10</sub>  | 8.69E-11 | PTR-ToF-MS | Cyclohexene, 1-methyl-cyclopentene; 2,3-dimethylbutadiene; 2-methyl-pentadiene; hexyne; 2-methyl-1,4-pentadiene; 3-methyl-1,3-pentadiene; 4-methyl-1,3-pentadiene; 1,2-hexadiene; 2-4-hexadiene; 1,4-hexadiene; 1,3-hexadiene; 1,5-Hexadiene | average | Atkinson and Arey, 2003; Boodaghians et al., 1987                           | 3.13 | C <sub>6</sub> dienes                                             |
| 85.1012                   | C <sub>6</sub> H <sub>12</sub>  | 6.63E-11 | PTR-ToF-MS | 2-Methyl-2-pentene; 2-Methyl-1-pentene; 3-Methyl-2-pentene; 2-Ethyl-1-butene; 2,3-Dimethyl-2-butene; 1-Hexene; 2-Hexene; 3-Hexene; 4-Methyl-2-pentene                                                                                        | average | Atkinson and Arey, 2003<br>Ohta, 1983; Grosjean and Williams, 1992          | 0.57 | C <sub>6</sub> alkenes                                            |
| 95.0856                   | C <sub>7</sub> H <sub>10</sub>  | 4.68E-11 | PTR-ToF-MS | 2-Norbornene                                                                                                                                                                                                                                 |         | Atkinson et al., 1983                                                       | 0.76 |                                                                   |
| 97.1012                   | C <sub>7</sub> H <sub>12</sub>  | 7.98E-11 | PTR-ToF-MS | 1-methyl-cyclohexene; cycloheptene; 2-methyl-1,5-hexadiene; 2,4-dimethyl-1,3-pentadiene                                                                                                                                                      | average | Aschmann et al., 2012; Atkinson and Arey, 2003; Grosjean and Williams, 1992 | 2.27 | C <sub>7</sub> dienes                                             |
| 109.1012                  | C <sub>8</sub> H <sub>12</sub>  | 1.07E-10 | PTR-ToF-MS | Bicyclo[2.2.2]oct-2-ene; 1,2,3-Trimethylcyclopentadiene                                                                                                                                                                                      | average | Atkinson and Arey, 2003; Grosjean and Williams, 1992                        | 3.82 |                                                                   |
| 111.1169                  | C <sub>8</sub> H <sub>14</sub>  | 1.20E-10 | PTR-ToF-MS | Z-Cyclooctene; 2,5-Dimethyl-2,4-hexadiene; 2,5-Dimethyl-1,5-hexadiene                                                                                                                                                                        |         | Aschmann et al., 2012; Atkinson and Arey, 2003                              | 1.89 | C <sub>8</sub> dienes                                             |
| 137.1325                  | C <sub>10</sub> H <sub>16</sub> | 3.73E-10 | PTR-ToF-MS | 1,3,7-Octatriene; $\alpha$ -Pinene                                                                                                                                                                                                           | average | IUPAC preferred value; Peeters et al., 2007                                 | 3.07 |                                                                   |
| 205.1951                  | C <sub>15</sub> H <sub>24</sub> | 1.01E-10 | PTR-ToF-MS | $\beta$ -caryophyllene; $\alpha$ -copaene; $\alpha$ -cedrene; $\alpha$ -humulene; E- $\beta$ -farnesene; Longifolene                                                                                                                         |         | Atkinson and Arey, 2003; IUPAC preferred values                             | 1.10 | Sesquiterpenes                                                    |
| <b>Aromatic Compounds</b> |                                 |          |            |                                                                                                                                                                                                                                              |         |                                                                             |      |                                                                   |
| m- and p-Xylene           | C <sub>8</sub> H <sub>10</sub>  | 1.87E-11 | GC-FID     |                                                                                                                                                                                                                                              | average | Atkinson and Arey, 2003                                                     | 0.26 |                                                                   |

|          |                                              |          |            |                                                                                        |                                                          |                                              |       |                                                                  |
|----------|----------------------------------------------|----------|------------|----------------------------------------------------------------------------------------|----------------------------------------------------------|----------------------------------------------|-------|------------------------------------------------------------------|
| 69.0335  | C <sub>4</sub> H <sub>4</sub> O              | 4.04E-11 | PTR-ToF-MS | Furan                                                                                  |                                                          | Atkinson, 1986                               | 0.28  |                                                                  |
| Benzene  | C <sub>6</sub> H <sub>6</sub>                | 1.20E-12 | GC-FID     |                                                                                        |                                                          | IUPAC preferred value                        | 0.03  |                                                                  |
| 80.0495  | C <sub>5</sub> H <sub>5</sub> N              | 5.31E-13 | PTR-ToF-MS | Pyridine                                                                               |                                                          | Yeung and Elrod, 2003                        | 0.002 |                                                                  |
| 83.0492  | C <sub>5</sub> H <sub>6</sub> O              | 9.00E-11 | PTR-ToF-MS | 3-methyl-furan                                                                         |                                                          | Atkinson et al., 1989                        | 0.79  |                                                                  |
| Toluene  | C <sub>7</sub> H <sub>8</sub>                | 5.60E-12 | GC-FID     |                                                                                        |                                                          | IUPAC preferred value                        | 0.23  |                                                                  |
| 94.0652  | C <sub>6</sub> H <sub>7</sub> N              | 5.68E-11 | PTR-ToF-MS | Aniline; 4-methyl-pyridine; 3-methyl-pyridine; 2-methyl-pyridine                       | average of methylpyridines and aniline rate coefficients | Witte et al., 1986; Yeung and Elrod, 2003    | 0.32  |                                                                  |
| 95.0492  | C <sub>6</sub> H <sub>6</sub> O              | 2.80E-11 | PTR-ToF-MS | Phenol                                                                                 |                                                          | IUPAC preferred value                        | 0.87  |                                                                  |
| 97.0648  | C <sub>6</sub> H <sub>8</sub> O              | 1.25E-10 | PTR-ToF-MS | 2,5-dimethylfuran                                                                      |                                                          | Aschmann et al., 2011                        | 0.86  |                                                                  |
| 105.0731 | C <sub>8</sub> H <sub>8</sub>                | 5.80E-11 | PTR-ToF-MS | Styrene                                                                                |                                                          | Atkinson and Arey, 2003                      | 0.66  |                                                                  |
| 107.0492 | C <sub>7</sub> H <sub>6</sub> O              | 1.26E-11 | PTR-ToF-MS | Benzaldehyde                                                                           |                                                          | IUPAC preferred value                        | 0.23  |                                                                  |
| 107.0855 | C <sub>8</sub> H <sub>10</sub>               | 1.36E-11 | PTR-ToF-MS | o-Xylene                                                                               |                                                          | Atkinson and Arey, 2003                      | 0.35  | m- and p-Xylene mixing ratios measured by GC-FID were subtracted |
| 108.0808 | C <sub>7</sub> H <sub>9</sub> N              | 9.60E-12 | PTR-ToF-MS | 2,6-dimethylpyridine; 2,4-dimethylpyridine; 2,3-dimethylpyridine; 2,5-dimethylpyridine | average                                                  | Yeung and Elrod, 2003                        | 0.20  |                                                                  |
| 119.0856 | C <sub>9</sub> H <sub>10</sub>               | 5.95E-11 | PTR-ToF-MS | α-methylstyrene; β-methylstyrene                                                       | average                                                  | Bignozzi et al., 1981                        | 0.72  |                                                                  |
| 121.0648 | C <sub>8</sub> H <sub>8</sub> O              | 1.61E-11 | PTR-ToF-MS | 4-methylbenzaldehyde; 3-methylbenzaldehyde; 2-methylbenzaldehyde; acetophenone         | average                                                  | Clifford et al., 2005; Aschmann et al., 2010 | 0.20  |                                                                  |
| 121.1012 | C <sub>9</sub> H <sub>12</sub>               | 5.70E-11 | PTR-ToF-MS | 1,3,5-trimethylbenzene                                                                 |                                                          | Atkinson and Arey, 2003                      | 0.91  |                                                                  |
| 123.0441 | C <sub>7</sub> H <sub>6</sub> O <sub>2</sub> | 1.20E-12 | PTR-ToF-MS | benzoic acid                                                                           | rate coefficient of benzene                              | IUPAC preferred value                        | 0.005 |                                                                  |
| 125.0961 | C <sub>8</sub> H <sub>12</sub> O             | 4.04E-11 | PTR-ToF-MS | 2,3,4,5-tetramethylfuran                                                               | rate coefficient of furan                                | Atkinson, 1986                               | 0.14  |                                                                  |
| 129.0699 | C <sub>10</sub> H <sub>8</sub>               | 2.30E-11 | PTR-ToF-MS | Naphthalene                                                                            |                                                          | Atkinson and Arey, 2003                      | 0.07  |                                                                  |
| 131.0856 | C <sub>10</sub> H <sub>10</sub>              | 2.30E-11 | PTR-ToF-MS | Dihydronaphthalene                                                                     | rate coefficient of naphthalene                          | Atkinson and Arey, 2003                      | 0.07  |                                                                  |

|              |                                              |          |                    |                                                                                     |                                                   |                                                             |       |  |
|--------------|----------------------------------------------|----------|--------------------|-------------------------------------------------------------------------------------|---------------------------------------------------|-------------------------------------------------------------|-------|--|
| 133.1012     | C <sub>10</sub> H <sub>12</sub>              | 3.37E-11 | PTR-ToF-MS         | Tetralin; 2-methyl-1-propenylbenzene                                                | average                                           | Atkinson and Arey, 2003; Chiorboli et al., 1983             | 0.19  |  |
| 135.0805     | C <sub>9</sub> H <sub>10</sub> O             | 3.0E-11  | PTR-ToF-MS         | Dimethylbenzaldehyde                                                                | average                                           | Tse et al., 1997; Aschmann et al., 2010                     | 0.18  |  |
| 135.1169     | C <sub>10</sub> H <sub>14</sub>              | 3.70E-11 | PTR-ToF-MS         | tert-butylbenzene; p-cymene; 1,2,3,5-tetramethylbenzene; 1,2,3,4-tetramethylbenzene | average                                           | Alarcón et al., 2015; Atkinson and Arey, 2003               | 1.02  |  |
| 143.0856     | C <sub>11</sub> H <sub>10</sub>              | 5.08E-11 | PTR-ToF-MS         | 2-methyl-Naphthalene; 1-methyl-naphthalene                                          | average                                           | Atkinson and Aschmann, 1986; Phousongphouang and Arey, 2002 | 0.94  |  |
| 147.1169     | C <sub>11</sub> H <sub>14</sub>              | 5.80E-11 | PTR-ToF-MS         | 4-isopropyl styrene; 3-pentenyl benzene                                             | rate coefficient of styrene                       | Atkinson and Arey, 2003                                     | 1.15  |  |
| 149.1325     | C <sub>11</sub> H <sub>16</sub>              | 1.10E-10 | PTR-ToF-MS         | Pentamethylbenzene                                                                  |                                                   | Alarcón et al., 2015                                        | 2.23  |  |
| 161.1325     | C <sub>12</sub> H <sub>16</sub>              | 5.80E-11 | PTR-ToF-MS         | 4-tert-butylstyrene                                                                 | rate coefficient of styrene                       | Atkinson and Arey, 2003                                     | 1.31  |  |
| 163.1482     | C <sub>12</sub> H <sub>18</sub>              | 1.13E-10 | PTR-ToF-MS         | Hexamethylbenzene                                                                   |                                                   | Atkinson and Arey, 2003                                     | 1.30  |  |
| 175.1482     | C <sub>13</sub> H <sub>18</sub>              | 3.85E-11 | PTR-ToF-MS         | 1-2,2-dimethyl-1-methylenepropyl-4-methylbenzene; 2-tert-butyl-indan                | average of indan and styrene rate coefficients    | Atkinson and Arey, 2003                                     | 1.02  |  |
| 189.1638     | C <sub>14</sub> H <sub>20</sub>              | 4.60E-11 | PTR-ToF-MS         | 3,5-dimethyl-t-butylstyrene; 1-t-butyltetralin                                      | average of styrene and tetralin rate coefficients | Atkinson and Arey, 2003                                     | 0.591 |  |
| 197.1325     | C <sub>15</sub> H <sub>16</sub>              | 4.15E-12 | PTR-ToF-MS         | 1,1'-1,3-propanediylbis-Benzene; 4-1-methylethyl-1,1'-Biphenyl                      | average of benzene and biphenyl                   | Atkinson and Arey, 2003; IUPAC preferred value              | 0.003 |  |
| 199.1482     | C <sub>15</sub> H <sub>18</sub>              | 2.30E-11 | PTR-ToF-MS         | substituted naphthalenes                                                            | rate coefficient of naphthalene                   | Atkinson and Arey, 2003                                     | 0.05  |  |
| <b>OVOCs</b> |                                              |          |                    |                                                                                     |                                                   |                                                             |       |  |
| Formaldehyde | HCHO                                         | 8.50E-12 | Aerolaser Hantzsch |                                                                                     |                                                   | IUPAC preferred value                                       | 2.33  |  |
| 33.0335      | CH <sub>3</sub> OH                           | 9.00E-13 | PTR-ToF-MS         | Methanol                                                                            |                                                   | IUPAC preferred value                                       | 0.24  |  |
| 45.0335      | C <sub>2</sub> H <sub>4</sub> O              | 1.50E-11 | PTR-ToF-MS         | Acetaldehyde                                                                        |                                                   | IUPAC preferred value                                       | 2.21  |  |
| 47.0128      | HCOOH                                        | 4.50E-13 | PTR-ToF-MS         | Formic acid                                                                         |                                                   | IUPAC preferred value                                       | 0.07  |  |
| 57.0335      | C <sub>3</sub> H <sub>4</sub> O              | 1.13E-11 | PTR-ToF-MS         | Acrolein                                                                            |                                                   | Atkinson and Arey, 2003                                     | 1.51  |  |
| 59.0491      | C <sub>3</sub> H <sub>6</sub> O              | 1.80E-13 | PTR-ToF-MS         | Acetone                                                                             |                                                   | IUPAC preferred value                                       | 0.16  |  |
| 61.0285      | C <sub>2</sub> H <sub>4</sub> O <sub>2</sub> | 6.90E-13 | PTR-ToF-MS         | Acetic acid                                                                         |                                                   | IUPAC preferred value                                       | 0.13  |  |
| 63.0441      | C <sub>2</sub> H <sub>6</sub> O <sub>2</sub> | 1.45E-11 | PTR-ToF-MS         | 1,2-ethanediol                                                                      |                                                   | IUPAC preferred value                                       | 0.18  |  |

|         |                                              |          |            |                                                                                                                                                                                                |         |                                                                                                  |       |                             |
|---------|----------------------------------------------|----------|------------|------------------------------------------------------------------------------------------------------------------------------------------------------------------------------------------------|---------|--------------------------------------------------------------------------------------------------|-------|-----------------------------|
| 65.0233 | CH <sub>4</sub> O <sub>3</sub>               | 7.10E-12 | PTR-ToF-MS | Hydroxymethyl hydroperoxide                                                                                                                                                                    |         | Allen et al., 2018                                                                               | 0.14  |                             |
| 71.0491 | C <sub>4</sub> H <sub>6</sub> O              | 2.45E-11 | PTR-ToF-MS | Methyl vinyl ketone; methacroleine; isoprene hydroxy hydroperoxide                                                                                                                             | average | IUPAC preferred values; St Clair et al., 2016                                                    | 0.42  |                             |
| 73.0284 | C <sub>3</sub> H <sub>4</sub> O <sub>2</sub> | 1.30E-11 | PTR-ToF-MS | Methyl glyoxal                                                                                                                                                                                 |         | IUPAC preferred value                                                                            | 0.21  |                             |
| 73.0648 | C <sub>4</sub> H <sub>8</sub> O              | 4.87E-11 | PTR-ToF-MS | Butanal; 2-methyl-propanal; tetrahydrofuran; 2-butanone (MEK); ethoxy ethene                                                                                                                   | average | IUPAC preferred value; Moriarty et al., 2003; Audley et al., 1981; Zhou et al., 2006             | 1.80  | C <sub>4</sub> carbonyls    |
| 75.0441 | C <sub>3</sub> H <sub>6</sub> O <sub>2</sub> | 2.85E-12 | PTR-ToF-MS | Hydroxyacetone; propanoic acid                                                                                                                                                                 | average | IUPAC preferred values                                                                           | 0.10  |                             |
| 77.0598 | C <sub>3</sub> H <sub>8</sub> O <sub>2</sub> | 1.62E-11 | PTR-ToF-MS | 2-methoxyethanol; 1,2-propanediol                                                                                                                                                              |         | IUPAC preferred value, Porter et al., 1997                                                       | 0.07  |                             |
| 85.0648 | C <sub>5</sub> H <sub>8</sub> O              | 4.43E-11 | PTR-ToF-MS | Cyclopentanone; E-2-pentenal; 3-methyl-3-buten-2-one; E-2-methyl-2-butenal; 3-methyl-2-butenal; 3-penten-2-one; 1-penten-3-one; 3,6-dihydro-2H-pyran                                           | average | Atkinson and Arey, 2003; Grosjean and Williams, 1992; Jiménez et al., 2009; Davis et al., 2007   | 0.52  |                             |
| 87.0441 | C <sub>4</sub> H <sub>6</sub> O <sub>2</sub> | 2.40E-11 | PTR-ToF-MS | 2,3-Butanedione; acetic acid ethenyl ester; 2-propenoic acid methyl ester; 4-hydroxy-2-butenal                                                                                                 | average | Baker et al., 2005a; Teruel et al., 2006; Blanco et al., 2009; Dagaut et al., 1988               | 0.61  | C <sub>4</sub> dioxygenates |
| 87.0805 | C <sub>5</sub> H <sub>10</sub> O             | 4.63E-11 | PTR-ToF-MS | Pentanal; 3-methyl-2-butanone; 3-pentanone; 2-pentanone; 1-vinyloxypropane; 2-Methyl-3-buten-2-ol MBO; 3-methyl-3-buten-1-ol; 2-methylbutanal; 3-methylbutanal; 1-penten-3-ol; Z-2-penten-1-ol | average | Zhou et al., 2006; IUPAC; Cometto et al., 2008; Atkinson and Arey, 2003; Orlando et al., 2001    | 2.48  |                             |
| 89.0234 | C <sub>3</sub> H <sub>4</sub> O <sub>3</sub> | 1.20E-13 | PTR-ToF-MS | Pyruvic acid                                                                                                                                                                                   |         | IUPAC preferred value                                                                            | 0.001 |                             |
| 89.0598 | C <sub>4</sub> H <sub>8</sub> O <sub>2</sub> | 6.47E-12 | PTR-ToF-MS | 1,4-dioxane; formic acid 1-methylethyl ester; ethyl acetate; butyric acid; acetoin; 1-hydroxy-3-butanone                                                                                       | average | Picquet et al., 1998; Aschmann et al., 2000; IUPAC; Moriarty et al., 2003; Pimentel et al., 2010 | 0.10  |                             |
| 91.039  | C <sub>3</sub> H <sub>6</sub> O <sub>3</sub> | 9.85E-13 | PTR-ToF-MS | carbonic acid dimethyl ester; methoxymethyl formate                                                                                                                                            | average | Katrib et al., 2002; O'Donnel et al., 2004                                                       | 0.003 |                             |
| 99.0805 | C <sub>6</sub> H <sub>10</sub> O             | 4.76E-11 | PTR-ToF-MS | Cyclohexanone; 5-hexen-2-                                                                                                                                                                      | average | Atkinson and Arey, 2003;                                                                         | 0.59  |                             |

|          |                                               |          |            |                                                                                                                                                                            |         |                                                                                                               |      |                                         |
|----------|-----------------------------------------------|----------|------------|----------------------------------------------------------------------------------------------------------------------------------------------------------------------------|---------|---------------------------------------------------------------------------------------------------------------|------|-----------------------------------------|
|          |                                               |          |            | one; z-3-methyl-3-penten-2-one; 4-methyl-3-penten-2-one; E-2-hexenal; Z-3-hexenal; 2-ethyl-2-butenal; E-4-hexene-3-one                                                     |         | Grosjean and Williams, 1992; Wang et al., 2010; Gao et al., 2009; Xing et al., 2012                           |      |                                         |
| 101.0598 | C <sub>5</sub> H <sub>8</sub> O <sub>2</sub>  | 3.17E-11 | PTR-ToF-MS | Methyl methacrylate; E-2-butenic acid methyl ester; acetylacetone; 2-propenoic acid ethyl ester; glutaraldehyde; vinyl propionate; isopropenyl acetate; n-propenyl acetate | average | Teruel et al., 2006; Teruel et al., 2012; Rogers, 1989; Ferrari et al., 1996; Dagaut et al., 1988             | 1.52 | C <sub>5</sub> dioxygenates             |
| 101.0961 | C <sub>6</sub> H <sub>12</sub> O              | 4.11E-11 | PTR-ToF-MS | Oxepane; 2-hexanone; hexanal; t-butyl vinyl ether; 2-methylpentanal; 3-methylpentanal; 4-methylpentanal; 3,3-dimethylbutanal; 2-ethylbutanal                               | average | Moriarty et al., 2003; Atkinson and Arey, 2003; Zhou et al., 2012; Le Calvé et al., 1998                      | 0.95 | C <sub>6</sub> oxygenates/<br>carbonyls |
| 103.0754 | C <sub>5</sub> H <sub>10</sub> O <sub>2</sub> | 8.71E-12 | PTR-ToF-MS | Butanoic acid methyl ester; n-propyl acetate; 1-hydroxy-2-methyl-3-butanone; 1-hydroxy-3-methyl-2-butanone; 1,2-dioxepane; 5-hydroxy-2-pentanone                           | average | Schütze et al., 2010; Ferrari et al., 1996; Moriarty et al., 2003; Aschmann et al., 2000; Baker et al., 2005b | 0.14 |                                         |
| 113.0598 | C <sub>6</sub> H <sub>8</sub> O <sub>2</sub>  | 5.80E-11 | PTR-ToF-MS | E-hexendione; Z-hexendione                                                                                                                                                 | average | Tuazon et al., 1985                                                                                           | 0.23 |                                         |
| 113.0961 | C <sub>7</sub> H <sub>12</sub> O              | 2.52E-11 | PTR-ToF-MS | E-2-Hepten-1-al; cycloheptanone                                                                                                                                            | average | Davis et al., 2007; Atkinson and Arey, 2003                                                                   | 0.16 |                                         |
| 115.0754 | C <sub>6</sub> H <sub>10</sub> O <sub>2</sub> | 3.40E-11 | PTR-ToF-MS | 2,5-hexanedione; ethyl-2-butenate; methacrylic acid ethyl ester                                                                                                            | average | Dagaut et al., 1988; Teruel et al., 2012; Blanco et al., 2006                                                 | 0.97 |                                         |
| 117.0911 | C <sub>6</sub> H <sub>12</sub> O <sub>2</sub> | 7.42E-12 | PTR-ToF-MS | 4-hydroxy-3-hexanone; acetic acid butyl ester; butanoic acid ethyl ester; methyl valerate                                                                                  | average | Schütze et al., 2010; Aschmann et al., 2000; Veillerot et al., 1996; Ferrari et al., 1996                     | 0.13 |                                         |
| 127.1118 | C <sub>8</sub> H <sub>14</sub> O              | 9.88E-11 | PTR-ToF-MS | E-2-octenal; cyclooctanone; 6-methyl-5-hepten-2-one                                                                                                                        | average | Gao et al., 2009; Smith et al., 1996                                                                          | 1.87 |                                         |



|                               |                                                |          |            |                                                                 |                                                |                                                     |       |  |
|-------------------------------|------------------------------------------------|----------|------------|-----------------------------------------------------------------|------------------------------------------------|-----------------------------------------------------|-------|--|
| 129.1274                      | C <sub>8</sub> H <sub>16</sub> O               | 1.10E-11 | PTR-ToF-MS | 2-octanone                                                      |                                                | Atkinson and Arey, 2003                             | 0.03  |  |
| 141.1274                      | C <sub>9</sub> H <sub>16</sub> O               | 4.35E-11 | PTR-ToF-MS | Nonenal                                                         |                                                | Gao et al., 2009                                    | 0.07  |  |
| 143.1067                      | C <sub>8</sub> H <sub>14</sub> O <sub>2</sub>  | 7.08E-11 | PTR-ToF-MS | Butyl methacrylate                                              |                                                | Blanco et al., 2009                                 | 1.14  |  |
| 143.1431                      | C <sub>9</sub> H <sub>18</sub> O               | 2.41E-11 | PTR-ToF-MS | Nonanal, 1-nonanone                                             | average                                        | Bowman et al., 2003;<br>Wallington and Kurylo, 1987 | 0.11  |  |
| 201.1485                      | C <sub>11</sub> H <sub>20</sub> O <sub>3</sub> | 7.35E-12 | PTR-ToF-MS | C <sub>11</sub> oxo esters e.g. 9-oxo-nonanoic acid ethyl ester | rate coefficient of acetic acid n-pentyl ester | Williams et al., 1993                               | 0.06  |  |
| <b>Sulfur-containing VOCs</b> |                                                |          |            |                                                                 |                                                |                                                     |       |  |
| 63.0263                       | C <sub>2</sub> H <sub>6</sub> S                | 4.80E-12 | PTR-ToF-MS | Dimethyl sulfide                                                |                                                | IUPAC preferred value                               | 0.06  |  |
| 80.9879                       | CH <sub>4</sub> S <sub>2</sub>                 | 3.30E-11 | PTR-ToF-MS | Methanedithiol                                                  | Rate constant of methanethiol                  | Atkinson et al., 2004                               | 0.10  |  |
| <b>NVOCs</b>                  |                                                |          |            |                                                                 |                                                |                                                     |       |  |
| 42.0338                       | C <sub>2</sub> H <sub>3</sub> N                | 2.20E-14 | PTR-ToF-MS | Acetonitrile                                                    |                                                | IUPAC preferred value                               | 0.001 |  |
| 46.0288                       | CH <sub>3</sub> NO                             | 1.50E-12 | PTR-ToF-MS | Formamide                                                       |                                                | Nizamov and Dagdigian, 2003                         | 0.02  |  |
| 54.0339                       | C <sub>3</sub> H <sub>3</sub> N                | 4.04E-12 | PTR-ToF-MS | Acrylonitrile                                                   |                                                | Harris et al., 1981                                 | 0.01  |  |
| 56.0495                       | C <sub>3</sub> H <sub>5</sub> N                | 2.56E-13 | PTR-ToF-MS | Propanenitrile                                                  |                                                | Sun et al., 2008                                    | 0.01  |  |
| 60.0444                       | C <sub>2</sub> H <sub>5</sub> NO               | 6.05E-12 | PTR-ToF-MS | Acetamide; N-methyl-formamide                                   | average                                        | Solignac et al., 2005; Barnes et al., 2010          | 0.41  |  |
| 62.0237                       | CH <sub>3</sub> NO <sub>2</sub>                | 2.60E-13 | PTR-ToF-MS | Methyl nitrite                                                  |                                                | Nielsen et al., 1991                                | 0.01  |  |
| 70.0652                       | C <sub>4</sub> H <sub>7</sub> N                | 2.56E-13 | PTR-ToF-MS | butanenitrile                                                   | rate coefficient of propanenitrile             | Sun et al., 2008                                    | 0.001 |  |
| 74.0601                       | C <sub>3</sub> H <sub>7</sub> NO               | 1.25E-11 | PTR-ToF-MS | N,N-dimethyl formamide, N-methyl acetamide                      | average                                        | Solignac et al., 2005; Barnes et al., 2010          | 0.08  |  |
| 84.0808                       | C <sub>5</sub> H <sub>9</sub> N                | 2.56E-13 | PTR-ToF-MS | Pentanenitrile                                                  | rate coefficient of propanenitrile             | Sun et al., 2008                                    | 0.001 |  |
| 136.1121                      | C <sub>9</sub> H <sub>13</sub> N               | 1.11E-10 | PTR-ToF-MS | N-Ethyl-N-methylaniline                                         | rate coefficient of aniline                    | Witte et al., 1986                                  | 0.35  |  |
| 150.1278                      | C <sub>10</sub> H <sub>15</sub> N              | 1.48E-10 | PTR-ToF-MS | Benzenamine, N,N,2,6-tetramethyl-                               | rate coefficient of N-N-dimethylbenzenamine    | Atkinson et al., 1987                               | 0.33  |  |
| <b>Halogenated VOCs</b>       |                                                |          |            |                                                                 |                                                |                                                     |       |  |

|                                  |                                                |          |                                                  |                                                |                                  |                       |       |  |
|----------------------------------|------------------------------------------------|----------|--------------------------------------------------|------------------------------------------------|----------------------------------|-----------------------|-------|--|
| 99.0053                          | CF <sub>3</sub> CHO                            | 1.50E-11 | PTR-ToF-MS                                       | Trifluoroacetaldehyde                          | rate coefficient of acetaldehyde | IUPAC preferred value | 0.16  |  |
| 101.0209                         | C <sub>2</sub> H <sub>3</sub> F <sub>3</sub> O | 1.23E-13 | PTR-ToF-MS                                       | 2,2,2-trifluoroethanol                         |                                  | Sellevåg et al., 2004 | 0.002 |  |
| 113.0153                         | C <sub>6</sub> H <sub>5</sub> Cl               | 6.02E-13 | PTR-ToF-MS                                       | Chlorobenzene                                  |                                  | Bryukov et al., 2009  | 0.003 |  |
| 129.0102                         | C <sub>6</sub> H <sub>5</sub> ClO              | 1.32E-11 | PTR-ToF-MS                                       | 2-chlorophenol; 3-chlorophenol; 4-chlorophenol | average                          | Kiliç et al., 2007    | 0.07  |  |
| <b>NO<sub>x</sub></b>            |                                                |          |                                                  |                                                |                                  |                       |       |  |
| Nitric oxide                     | NO                                             | 9.70E-12 | Two-channel CLD                                  |                                                |                                  | IUPAC preferred value | 29.3  |  |
| Nitrogen dioxide                 | NO <sub>2</sub>                                | 9.80E-12 | Two-channel CLD                                  |                                                |                                  | IUPAC preferred value | 6.94  |  |
| <b>Other inorganic compounds</b> |                                                |          |                                                  |                                                |                                  |                       |       |  |
| Ozone                            | O <sub>3</sub>                                 | 7.30E-14 | UV Photometric O <sub>3</sub> Analyzer           |                                                |                                  | IUPAC preferred value | 0.26  |  |
| Nitrous acid                     | HONO                                           | 6.00E-12 | Long Path Absorption Photometer                  |                                                |                                  | IUPAC preferred value | 0.13  |  |
| Sulfur dioxide                   | SO <sub>2</sub>                                | 9.30E-13 | Chemical Ionization Mass Spectrometer            |                                                |                                  | IUPAC preferred value | 0.33  |  |
| Carbon monoxide                  | CO                                             | 1.44E-13 | Picarro Cavity ring-down spectroscopy instrument |                                                |                                  | IUPAC preferred value | 1.16  |  |

## References for reaction rate coefficients

- Alarcón, P., Bohn, B., and Zetzsch, C.: Kinetic and mechanistic study of the reaction of OH radicals with methylated benzenes: 1,4-dimethyl-, 1,3,5-trimethyl-, 1,2,4,5-, 1,2,3,5- and 1,2,3,4-tetramethyl-, pentamethyl-, and hexamethylbenzene, *Physical chemistry chemical physics PCCP*, 17, 13053–13065, doi:10.1039/c5cp00253b, 2015.
- Allen, H. M., Crounse, J. D., Bates, K. H., Teng, A. P., Krawiec-Thayer, M. P., Rivera-Rios, J. C., Keutsch, F. N., St Clair, J. M., Hanisco, T. F., Møller, K. H., Kjaergaard, H. G., and Wennberg, P. O.: Kinetics and Product Yields of the OH Initiated Oxidation of Hydroxymethyl Hydroperoxide, *The journal of physical chemistry. A*, 122, 6292–6302, doi:10.1021/acs.jpca.8b04577, 2018.
- Aschmann, S. M., Arey, J., and Atkinson, R.: Atmospheric Chemistry of Selected Hydroxycarbonyls, *J. Phys. Chem. A*, 104, 3998–4003, doi:10.1021/jp9939874, 2000.
- Aschmann, S. M., Arey, J., and Atkinson, R.: Extent of H-atom abstraction from OH+p-cymene and upper limits to the formation of cresols from OH+m-xylene and OH+p-cymene, *ATMOSPHERIC ENVIRONMENT*, 44, 3970–3975, doi:10.1016/j.atmosenv.2010.06.059, 2010.

- Aschmann, S. M., Arey, J., and Atkinson, R.: Kinetics and products of the reactions of OH radicals with cyclohexene, 1-methyl-1-cyclohexene, cis-cyclooctene, and cis-cyclodecene, *The journal of physical chemistry. A*, 116, 9507–9515, doi:10.1021/jp307217m, 2012.
- Aschmann, S. M., Nishino, N., Arey, J., and Atkinson, R.: Kinetics of the reactions of OH radicals with 2- and 3-methylfuran, 2,3- and 2,5-dimethylfuran, and E- and Z-3-hexene-2,5-dione, and products of OH + 2,5-dimethylfuran, *Environmental science & technology*, 45, 1859–1865, doi:10.1021/es103207k, 2011.
- Atkinson, R.: Kinetics and mechanisms of the gas-phase reactions of the hydroxyl radical with organic compounds under atmospheric conditions, *Chemical reviews*, 86, 69–201, doi:10.1021/cr00071a004, 1986.
- Atkinson, R. and Arey, J.: Atmospheric degradation of volatile organic compounds, *Chemical reviews*, 103, 4605–4638, doi:10.1021/cr0206420, 2003.
- Atkinson, R. and Aschmann, S. M.: Kinetics of the reactions of naphthalene, 2-methylnaphthalene, and 2,3-dimethylnaphthalene with OH radicals and with O<sub>3</sub> at 295 ± 1 K, *Int. J. Chem. Kinet.*, 18, 569–573, doi:10.1002/kin.550180507, 1986.
- Atkinson, R., Aschmann, S. M., and Carter, W. P. L.: Effects of ring strain on gas-phase rate constants. 2. OH radical reactions with cycloalkenes, *Int. J. Chem. Kinet.*, 15, 1161–1177, doi:10.1002/kin.550151105, 1983.
- Atkinson, R., Aschmann, S. M., Tuazon, E. C., Arey, J., and Zielinska, B.: Formation of 3-Methylfuran from the gas-phase reaction of OH radicals with isoprene and the rate constant for its reaction with the OH radical, *Int. J. Chem. Kinet.*, 21, 593–604, doi:10.1002/kin.550210709, 1989.
- Atkinson, R., Baulch, D. L., Cox, R. A., Crowley, J. N., Hampson, R. F., Hynes, R. G., Jenkin, M. E., Rossi, M. J., and Troe, J.: Evaluated kinetic and photochemical data for atmospheric chemistry: Volume I - gas phase reactions of O<sub>x</sub>, HO<sub>x</sub>, NO<sub>x</sub> and SO<sub>x</sub> species, *Atmos. Chem. Phys.*, 4, 1461–1738, doi:10.5194/acp-4-1461-2004, 2004.
- Atkinson, R., Tuazon, E. C., Wallington, T. J., Aschmann, S. M., Arey, J., Winer, A. M., and Pitts, J. N.: Atmospheric chemistry of aniline, N,N-dimethylaniline, pyridine, 1,3,5-triazine, and nitrobenzene, *Environ. Sci. Technol.*, 21, 64–72, doi:10.1021/es00155a007, 1987.
- Audley, G. J., Baulch, D. L., and Campbell, I. M.: Gas-phase reactions of hydroxyl radicals with aldehydes in flowing H<sub>2</sub>O<sub>2</sub>+ NO<sub>2</sub>+ CO mixtures, *J. Chem. Soc., Faraday Trans. 1*, 77, 2541, doi:10.1039/f19817702541, 1981.
- Baker, J., Arey, J., and Atkinson, R.: Formation and Reaction of Hydroxycarbonyls from the Reaction of OH Radicals with 1,3-Butadiene and Isoprene, *Environ. Sci. Technol.*, 39, 4091–4099, doi:10.1021/es047930t, 2005a.
- Baker, J., Arey, J., and Atkinson, R.: Rate constants for the reactions of OH radicals with a series of 1,4-hydroxyketones, *Journal of Photochemistry and Photobiology A: Chemistry*, 176, 143–148, doi:10.1016/j.jphotochem.2005.07.022, 2005b.
- Barnes, I., Solignac, G., Mellouki, A., and Becker, K. H.: Aspects of the atmospheric chemistry of amides, *Chemphyschem a European journal of chemical physics and physical chemistry*, 11, 3844–3857, doi:10.1002/cphc.201000374, 2010.
- Bignozzi, C. A., Maldotti, A., Chiorboli, C., Bartocci, C., and Carassiti, V.: Kinetics and mechanism of reactions between aromatic olefins and hydroxyl radicals, *Int. J. Chem. Kinet.*, 13, 1235–1242, doi:10.1002/kin.550131204, 1981.
- Blanco, M. B., Bejan, I., Barnes, I., Wiesen, P., and Teruel, M. A.: OH-initiated degradation of unsaturated esters in the atmosphere: Kinetics in the temperature range of 287–313 K, *The journal of physical chemistry. A*, 113, 5958–5965, doi:10.1021/jp901755x, 2009.
- Blanco, M. B., Taccone, R. A., Lane, S. I., and Teruel, M. A.: On the OH-initiated degradation of methacrylates in the troposphere: Gas-phase kinetics and formation of pyruvates, *Chemical Physics Letters*, 429, 389–394, doi:10.1016/j.cplett.2006.08.088, 2006.
- Boodaghians, R. B., Hall, I. W., Toby, F. S., and Wayne, R. P.: Absolute determinations of the kinetics and temperature dependences of the reactions of OH with a series of alkynes, *J. Chem. Soc., Faraday Trans. 2*, 83, 2073, doi:10.1039/f29878302073, 1987.
- Bowman, J. H., Barket, D. J., and Shepson, P. B.: Atmospheric Chemistry of Nonanal, *Environ. Sci. Technol.*, 37, 2218–2225, doi:10.1021/es026220p, 2003.
- Bryukov, M. G., Knyazev, V. D., Gehling, W. M., and Dellinger, B.: Kinetics of the gas-phase reaction of OH with chlorobenzene, *The journal of physical chemistry. A*, 113, 10452–10459, doi:10.1021/jp9049186, 2009.
- Chiorboli, C., Bignozzi, C. A., Maldotti, A., Giardini, P. F., Rossi, A., and Carassiti, V.: Rate constants for the gas-phase reactions of OH radicals with dimethylstyrene and acetone. Mechanism of dimethylstyrene NO<sub>x</sub> - air photooxidation, *Int. J. Chem. Kinet.*, 15, 579–586, doi:10.1002/kin.550150608, 1983.
- Clifford, G. M., Thüner, L. P., Wenger, J. C., and Shallcross, D. E.: Kinetics of the gas-phase reactions of OH and NO<sub>3</sub> radicals with aromatic aldehydes, *Journal of Photochemistry and Photobiology A: Chemistry*, 176, 172–182, doi:10.1016/j.jphotochem.2005.09.022, 2005.
- Dagaut, P., Wallington, T. J., Liu, R., and Kurylo, M. J.: A kinetic investigation of the gas-phase reactions of hydroxyl radicals with cyclic ketones and diones: Mechanistic insights, *J. Phys. Chem.*, 92, 4375–4377, doi:10.1021/j100326a026, 1988.
- Davis, M. E., Gilles, M. K., Ravishankara, A. R., and Burkholder, J. B.: Rate coefficients for the reaction of OH with E-2-pentenal, E-2-hexenal, and E-2-heptenal, *Physical chemistry chemical physics PCCP*, 9, 2240–2248, doi:10.1039/b700235a, 2007.

- Ferrari, C., Roche, A., Jacob, V., Foster, P., and Baussand, P.: Kinetics of the reaction of OH radicals with a series of esters under simulated conditions at 295 K, *Int. J. Chem. Kinet.*, 28, 609–614, doi:10.1002/(SICI)1097-4601(1996)28:8<609::AID-KIN6>3.0.CO;2-Z, 1996.
- Gao, T., Andino, J. M., Rivera, C. C., and Márquez, M. F.: Rate constants of the gas-phase reactions of OH radicals with trans -2-hexenal, trans -2-octenal, and trans -2-nonenal, *Int. J. Chem. Kinet.*, 41, 483–489, doi:10.1002/kin.20424, 2009.
- Grosjean, D. and Williams, E. L.: Environmental persistence of organic compounds estimated from structure-reactivity and linear free-energy relationships. Unsaturated aliphatics, *Atmospheric Environment. Part A. General Topics*, 26, 1395–1405, doi:10.1016/0960-1686(92)90124-4, 1992.
- Harris, G. W., Kleindienst, T. E., and Pitts, J. N.: Rate constants for the reaction of OH radicals with CH<sub>3</sub>CN, C<sub>2</sub>H<sub>5</sub>CN and CH<sub>2</sub>CH-CN in the temperature range 298–424 K, *Chemical Physics Letters*, 80, 479–483, doi:10.1016/0009-2614(81)85061-0, 1981.
- IUPAC Task Group on Atmospheric Chemical Kinetic Data Evaluation: Datasheets - gas phase: <http://iupac.pole-ether.fr/>, last access: 10 December 2018.
- Jiménez, E., Lanza, B., Antiñolo, M., and Albaladejo, J.: Influence of temperature on the chemical removal of 3-methylbutanal, trans-2-methyl-2-butenal, and 3-methyl-2-butenal by OH radicals in the troposphere, *ATMOSPHERIC ENVIRONMENT*, 43, 4043–4049, doi:10.1016/j.atmosenv.2009.05.005, 2009.
- Katrib, Y., Deiber, G., Mirabel, P., Le Calvé, S., George, C., Mellouki, A., and Le Bras, G.: Atmospheric Loss Processes of Dimethyl and Diethyl Carbonate, *Journal of Atmospheric Chemistry*, 43, 151–174, doi:10.1023/A:1020605807298, 2002.
- Kiliç, M., Koçtürk, G., San, N., and Cinar, Z.: A model for prediction of product distributions for the reactions of phenol derivatives with hydroxyl radicals, *Chemosphere*, 69, 1396–1408, doi:10.1016/j.chemosphere.2007.05.002, 2007.
- Le Calvé, S., Hitier, D., Le Bras, G., and Mellouki, A.: Kinetic Studies of OH Reactions with a Series of Ketones, *J. Phys. Chem. A*, 102, 4579–4584, doi:10.1021/jp980848y, 1998.
- Moriarty, J., Sidebottom, H., Wenger, J., Mellouki, A., and Le Bras, G.: Kinetic Studies on the Reactions of Hydroxyl Radicals with Cyclic Ethers and Aliphatic Diethers, *J. Phys. Chem. A*, 107, 1499–1505, doi:10.1021/jp021267i, 2003.
- Nielsen, O. J., Sidebottom, H. W., Donlon, M., and Treacy, J.: Rate constants for the gas-phase reactions of OH radicals and Cl atoms with n-alkyl nitrites at atmospheric pressure and 298 K, *Int. J. Chem. Kinet.*, 23, 1095–1109, doi:10.1002/kin.550231204, 1991.
- Nizamov, B. and Dagdigan, P. J.: Spectroscopic and Kinetic Investigation of Methylene Amidogen by Cavity Ring-Down Spectroscopy, *J. Phys. Chem. A*, 107, 2256–2263, doi:10.1021/jp022197i, 2003.
- O'Donnel, S. M., Sidebottom, H. W., Wenger, J. C., Mellouki, A., and Le Bras, G.: Kinetic Studies on the Reactions of Hydroxyl Radicals with a Series of Alkoxy Esters, *J. Phys. Chem. A*, 108, 7386–7392, doi:10.1021/jp048782w, 2004.
- Ohta, T.: Rate constants for reactions of diolefins with hydroxyl radicals in the gas phase. Estimate of the rate constants from those for monoolefins, *J. Phys. Chem.*, 87, 1209–1213, doi:10.1021/j100230a023, 1983.
- Orlando, J. J., Tyndall, G. S., and Ceazan, N.: Rate Coefficients and Product Yields from Reaction of OH with 1-Penten-3-ol, Z -2-Penten-1-ol, and Allyl Alcohol 2-Propen-1-ol, *J. Phys. Chem. A*, 105, 3564–3569, doi:10.1021/jp0041712, 2001.
- Peeters, J., Boullart, W., Pultau, V., Vandenberg, S., and Vereecken, L.: Structure-activity relationship for the addition of OH to polyalkenes: Site-specific and total rate constants, *J. Phys. Chem. A*, 111, 1618–1631, doi:10.1021/jp066973o, 2007.
- Phousongphouang, P. T. and Arey, J.: Rate Constants for the Gas-Phase Reactions of a Series of Alkyl naphthalenes with the OH Radical, *Environ. Sci. Technol.*, 36, 1947–1952, doi:10.1021/es011434c, 2002.
- Picquet, B., Heroux, S., Chebbi, A., Doussin, J.-F., Durand-Jolibois, R., Monod, A., Loirat, H., and Carlier, P.: Kinetics of the reactions of OH radicals with some oxygenated volatile organic compounds under simulated atmospheric conditions, *Int. J. Chem. Kinet.*, 30, 839–847, doi:10.1002/(SICI)1097-4601(1998)30:11<839::AID-KIN6>3.0.CO;2-W, 1998.
- Pimentel, A. S., Tyndall, G. S., Orlando, J. J., Hurley, M. D., Wallington, T. J., Sulbaek Andersen, M. P., Marshall, P., and Dibble, T. S.: Atmospheric chemistry of isopropyl formate and tert-butyl formate, *Int. J. Chem. Kinet.*, 42, 479–498, doi:10.1002/kin.20498, 2010.
- Porter, E., Wenger, J., Treacy, J., Sidebottom, H., Mellouki, A., Téton, S., and LeBras, G.: Kinetic Studies on the Reactions of Hydroxyl Radicals with Diethers and Hydroxyethers, *J. Phys. Chem. A*, 101, 5770–5775, doi:10.1021/jp971254i, 1997.
- Rogers, J. D.: Rate constant measurements for the reaction of the hydroxyl radical with cyclohexene, cyclopentene, and glutaraldehyde, *Environ. Sci. Technol.*, 23, 177–181, doi:10.1021/es00179a006, 1989.
- Schütze, N., Zhong, X., Kirschbaum, S., Bejan, I., Barnes, I., and Benter, T.: Relative kinetic measurements of rate coefficients for the gas-phase reactions of Cl atoms and OH radicals with a series of methyl alkyl esters, *ATMOSPHERIC ENVIRONMENT*, 44, 5407–5414, doi:10.1016/j.atmosenv.2009.08.011, 2010.
- Sellevåg, S. R., Nielsen, C. J., Søvde, O. A., Myhre, G., Sundet, J. K., Stordal, F., and Isaksen, I. S. A.: Atmospheric gas-phase degradation and global warming potentials of 2-fluoroethanol, 2,2-difluoroethanol, and 2,2,2-trifluoroethanol, *ATMOSPHERIC ENVIRONMENT*, 38, 6725–6735, doi:10.1016/j.atmosenv.2004.09.023, 2004.

- Smith, A. M., Rigler, E., Kwok, E. S. C., and Atkinson, R.: Kinetics and Products of the Gas-Phase Reactions of 6-Methyl-5-hepten-2-one and trans -Cinnamaldehyde with OH and NO<sub>3</sub> Radicals and O<sub>3</sub> at 296 ± 2 K, *Environ. Sci. Technol.*, 30, 1781–1785, doi:10.1021/es950871m, 1996.
- Solignac, G., Mellouki, A., Le Bras, G., Barnes, I., and Benter, T.: Kinetics of the OH and Cl reactions with N-methylformamide, N,N-dimethylformamide and N,N-dimethylacetamide, *Journal of Photochemistry and Photobiology A: Chemistry*, 176, 136–142, doi:10.1016/j.jphotochem.2005.07.020, 2005.
- St Clair, J. M., Rivera-Rios, J. C., Crounse, J. D., Knap, H. C., Bates, K. H., Teng, A. P., Jørgensen, S., Kjaergaard, H. G., Keutsch, F. N., and Wennberg, P. O.: Kinetics and Products of the Reaction of the First-Generation Isoprene Hydroxy Hydroperoxide ISOPOOH with OH, *The journal of physical chemistry. A*, 120, 1441–1451, doi:10.1021/acs.jpca.5b06532, 2016.
- Sun, J., Tang, Y., Sun, H., Pan, Y., Jia, X., Pan, X., and Wang, R.: Mechanistic and kinetic study of the OH+C<sub>2</sub>H<sub>5</sub>CN reaction, *Chemical Physics Letters*, 463, 315–321, doi:10.1016/j.cplett.2008.08.055, 2008.
- Teruel, M. A., Benitez-Villalba, J., Caballero, N., and Blanco, M. B.: Gas-phase oxidation of methyl crotonate and ethyl crotonate. kinetic study of their reactions toward OH radicals and Cl atoms, *The journal of physical chemistry. A*, 116, 6127–6133, doi:10.1021/jp2113889, 2012.
- Teruel, M. A., Lane, S. I., Mellouki, A., Solignac, G., and Le Bras, G.: OH reaction rate constants and UV absorption cross-sections of unsaturated esters, *ATMOSPHERIC ENVIRONMENT*, 40, 3764–3772, doi:10.1016/j.atmosenv.2006.03.003, 2006.
- Tse, C. W., Flagan, R. C., and Seinfeld, J. H.: Rate constants for the gas-phase reaction of the hydroxyl radical with a series of dimethylbenzaldehydes and trimethylphenols at atmospheric pressure, *Int. J. Chem. Kinet.*, 29, 523–525, doi:10.1002/(SICI)1097-4601(1997)29:7<523::AID-KIN6>3.0.CO;2-W, 1997.
- Tuazon, E. C., Atkinson, R., and Carter, W. P.: Atmospheric chemistry of cis- and trans-3-hexene-2,5-dione, *Environmental science & technology*, 19, 265–269, doi:10.1021/es00133a009, 1985.
- Veillerot, M., Foster, P., Guillermo, R., and Galloo, J. C.: Gas-phase reaction of n-butyl acetate with the hydroxyl radical under simulated tropospheric conditions: Relative rate constant and product study, *Int. J. Chem. Kinet.*, 28, 235–243, doi:10.1002/(SICI)1097-4601(1996)28:4<235::AID-KIN1>3.0.CO;2-W, 1996.
- Wallington, T. J. and Kurylo, M. J.: Flash photolysis resonance fluorescence investigation of the gas-phase reactions of hydroxyl radicals with a series of aliphatic ketones over the temperature range 240–440 K, *J. Phys. Chem.*, 91, 5050–5054, doi:10.1021/j100303a033, 1987.
- Wang, K., Ge, M., and Wang, W.: Kinetics of the gas-phase reactions of 5-hexen-2-one with OH and NO<sub>3</sub> radicals and O<sub>3</sub>, *Chemical Physics Letters*, 490, 29–33, doi:10.1016/j.cplett.2010.03.023, 2010.
- Warnatz, J.: Rate Coefficients in the C/H/O System, in: *Combustion Chemistry*, Gardiner, W. C. Ed., Springer US, New York, NY, 197–360, 1984.
- Williams, D. C., O'Rji, L. N., and Stone, D. A.: Kinetics of the reactions of OH radicals with selected acetates and other esters under simulated atmospheric conditions, *Int. J. Chem. Kinet.*, 25, 539–548, doi:10.1002/kin.550250704, 1993.
- Witte, F., Urbanik, E., and C, Z.: Temperature dependence of the rate constants for the addition of hydroxyl to benzene and to some monosubstituted aromatics aniline, bromobenzene, and nitrobenzene and the unimolecular decay of the adducts. Part 2. Kinetics into a quasi-equilibrium, *J. Phys. Chem.*, 90, 3251–3259, doi:10.1021/j100405a040, 1986.
- Xing, J.-H., Ono, M., Kuroda, A., Obi, K., Sato, K., and Imamura, T.: Kinetic study of the daytime atmospheric fate of Z-3-hexenal, *The journal of physical chemistry. A*, 116, 8523–8529, doi:10.1021/jp303202h, 2012.
- Yeung, L. Y. and Elrod, M. J.: Experimental and Computational Study of the Kinetics of OH + Pyridine and Its Methyl- and Ethyl-Substituted Derivatives, *J. Phys. Chem. A*, 107, 4470–4477, doi:10.1021/jp027389s, 2003.
- Zhou, S., Barnes, I., Zhu, T., Bejan, I., and Benter, T.: Kinetic study of the gas-phase reactions of OH and NO<sub>3</sub> radicals and O<sub>3</sub> with selected vinyl ethers, *J. Phys. Chem. A*, 110, 7386–7392, doi:10.1021/jp061431s, 2006.
- Zhou, S., Barnes, I., Zhu, T., and Benter, T.: Kinetic study of gas-phase reactions of OH and NO<sub>3</sub> radicals and O<sub>3</sub> with iso-butyl and tert-butyl vinyl ethers, *The journal of physical chemistry. A*, 116, 8885–8892, doi:10.1021/jp305992a, 2012.
